# Supplementary material for: Improving Effects of Afforestation with Different Forest Types on Soil Nutrients and Bacterial Community in Barren Hills of North China
Source: MDPI journal article supplement (doi:10.3390/su14031202), 2022-01-21
Supplement: s1 [file s1]

Archive with 1 entries (1 files):
- sustainability-1500585-supplementary.pdf
