# Supplementary material for: Improving Effects of Afforestation with Different Forest Types on Soil Nutrients and Bacterial Community in Barren Hills of North China
Source: MDPI journal article supplement (doi:10.3390/su14031202), 2022-01-21
Supplement: s1 [file s1 › sustainability-1500585-supplementary.pdf]

## Supplement Figures:

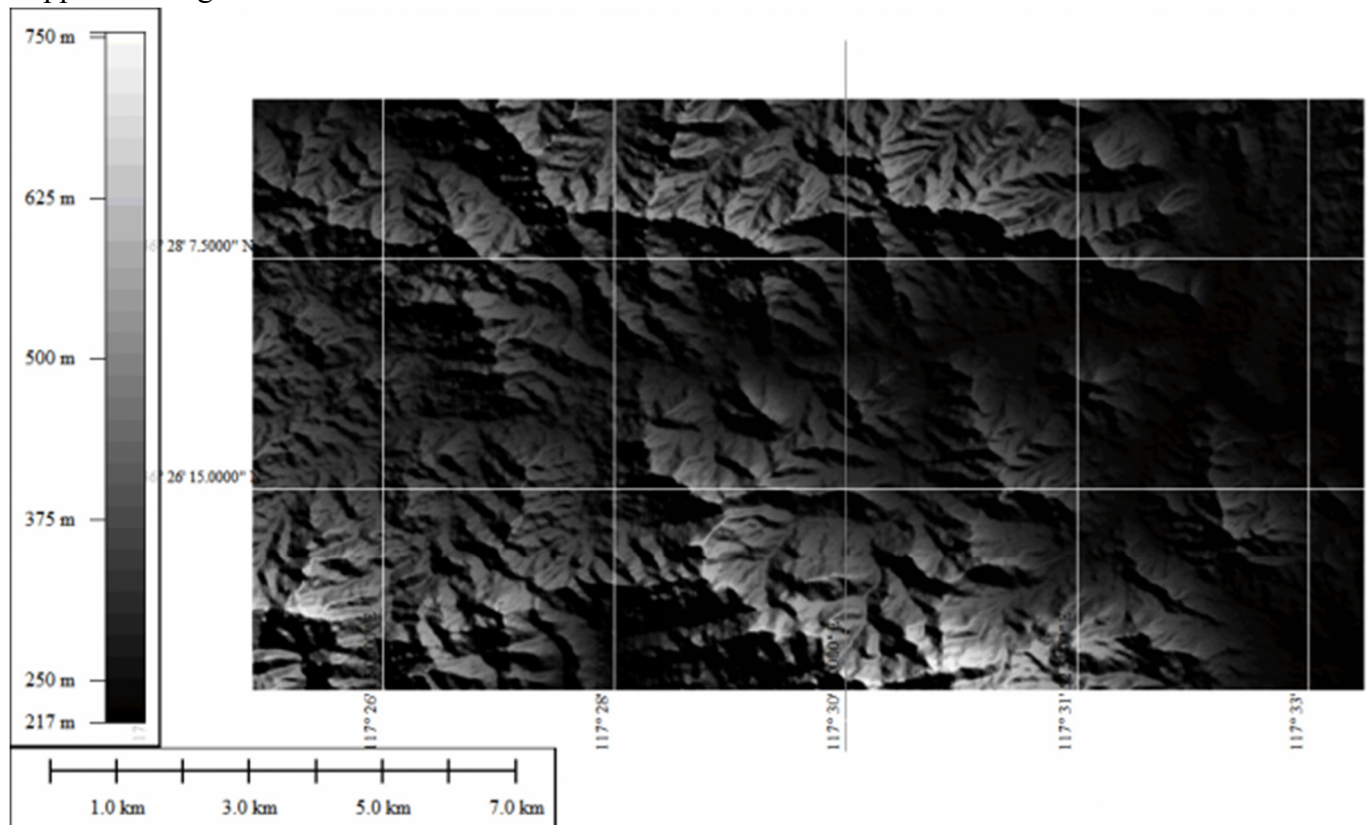

S1: Topographic map of Fanggan ecological restoration area

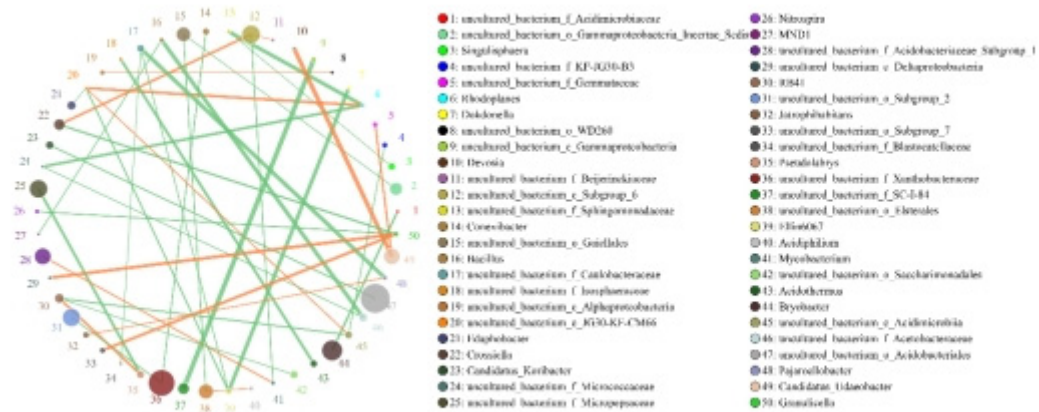

(S2: total)

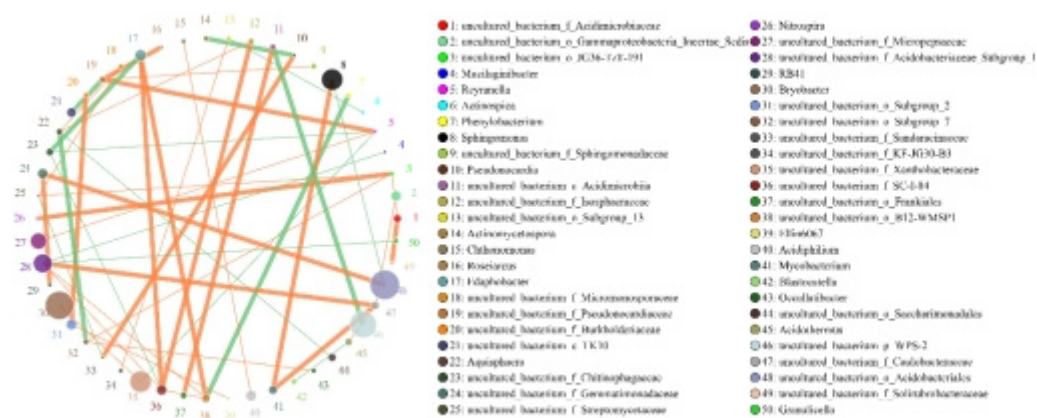

(S3: shrub)

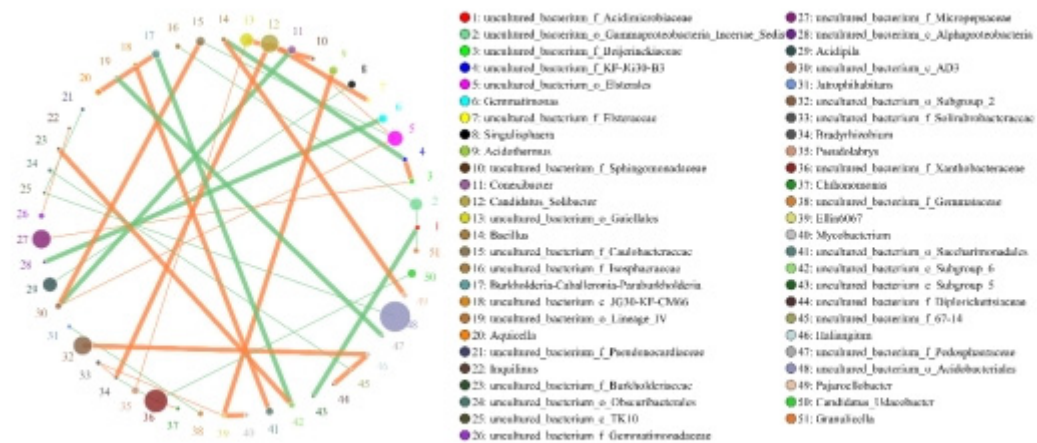

(S4: coniferous forest)

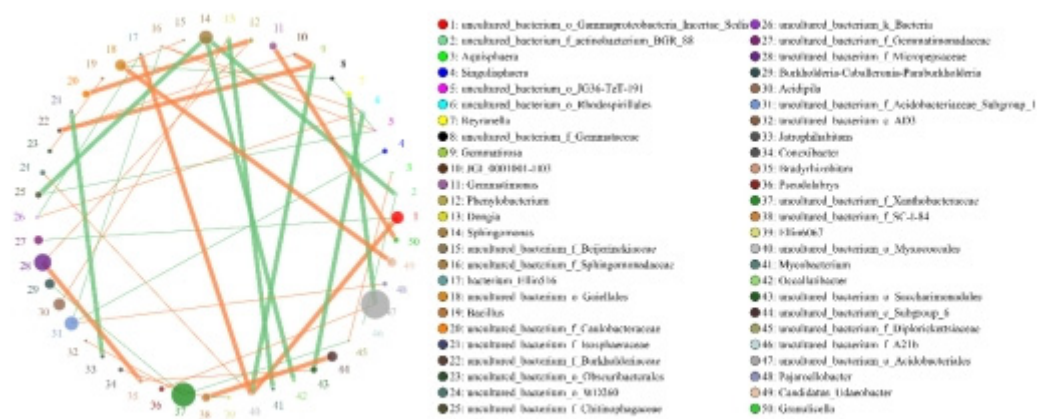

(S5: mixed forests)

Supplement Figures S2–S5: Network of surface soil bacteria in different vegetation types at genera level

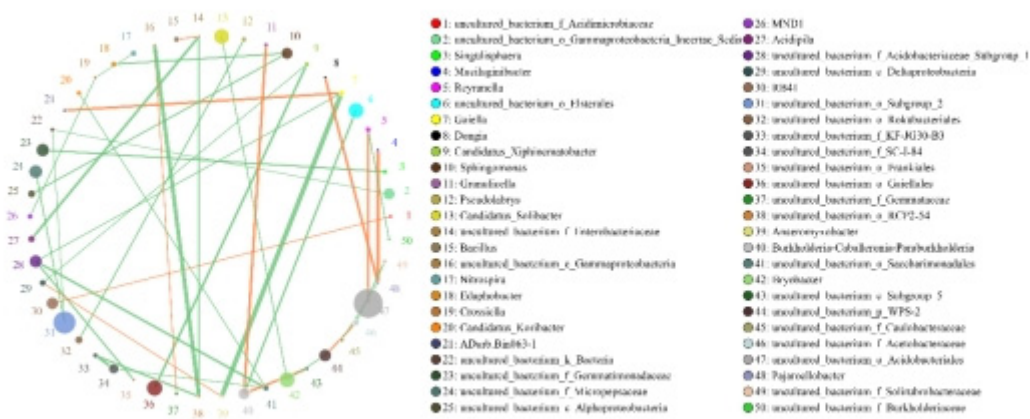

(S6: total)

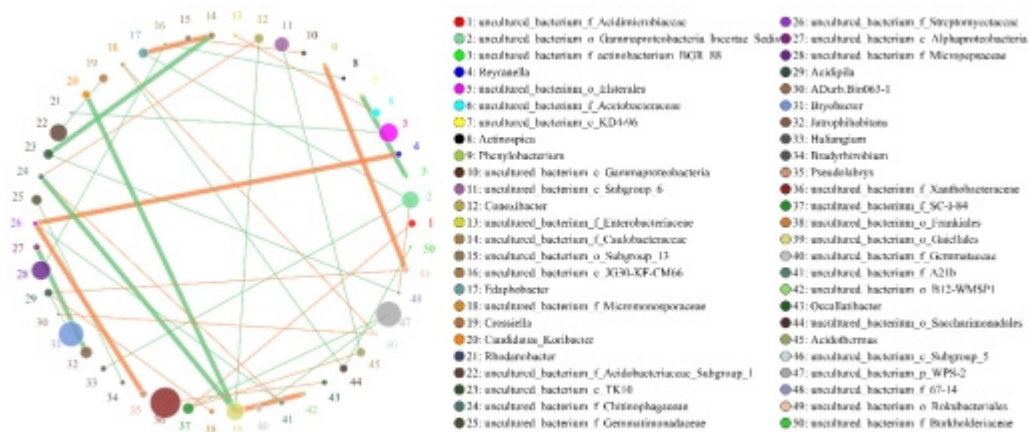

(S7: shrub)

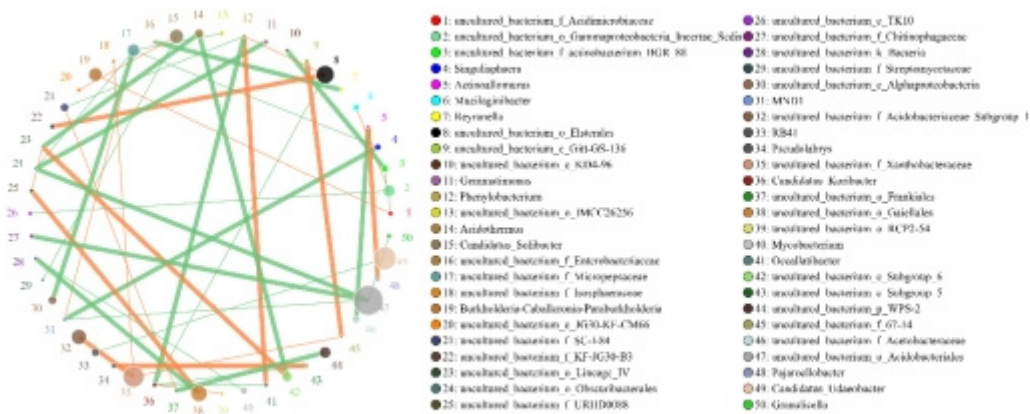

(S8: coniferous forests)

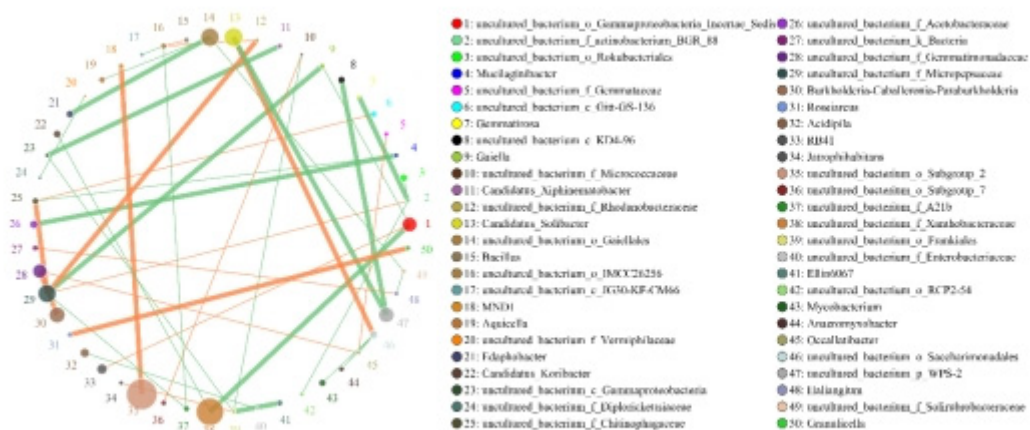

(S9: mixed forests)

Supplement Figures S6–S9: Network of lower soil bacteria in different vegetation types at genera level
